# Supplementary figures and images for: Towards a Next-Generation Sequencing Diagnostic Service for Tumour Genotyping: A Comparison of Panels and Platforms
Source: Hindawi journal article supplement (doi:10.1155/2015/478017), 2015-01-01

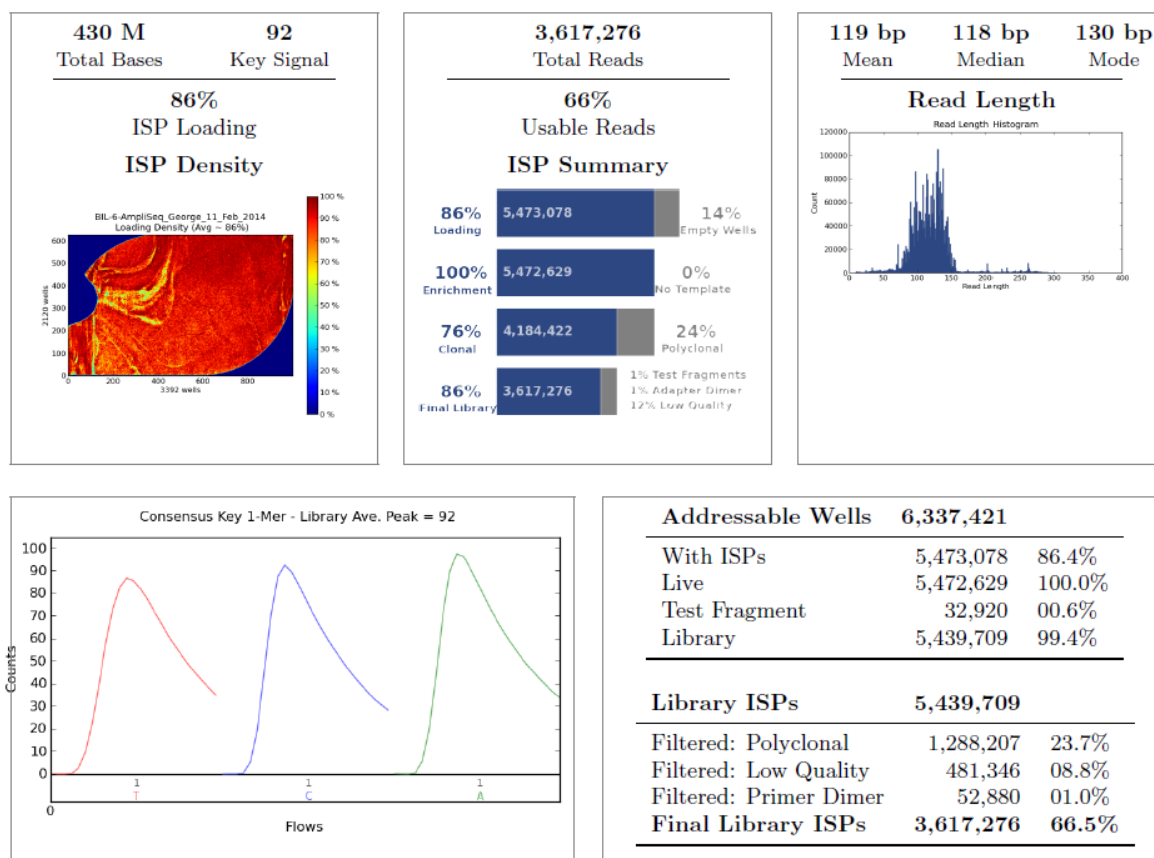

**Figure S1. Ion PGM Run Summary**

Supplement: f1 [file 478017.f1.zip]
